1           **Analysis of associations between polygenic risk score and COVID-19 severity in**  
2                           **Russian population using low-pass genome sequencing**

3  
4           Arina V. Nostaeva<sup>1</sup>, Valentin S. Shimansky<sup>1,2</sup>, Svetlana V. Apalko<sup>1,2</sup>, Ivan A. Kuznetsov<sup>3</sup>,  
5           Natalya N. Sushentseva<sup>1</sup>, Oleg S. Popov<sup>1,2</sup>, Yurii S. Aulchenko<sup>4,5</sup>, Sergey G. Shcherbak<sup>1,2</sup>

6  
7           <sup>1</sup> St. Petersburg State Budgetary Healthcare Institution “City Hospital No. 40 of Kurortny  
8           District”, Sestroretsk, Russia

9           <sup>2</sup> St. Petersburg State University, St. Petersburg, Russia

10          <sup>3</sup> Skolkovo Institute of Science and Technology, Moscow, Russia

11          <sup>4</sup> Institute of Cytology and Genetics, Siberian Branch of Russian Academy of Sciences,  
12          Novosibirsk, Russia;

13          <sup>5</sup> PolyKnomics BV, The Netherlands

14  
15          Please address correspondence to:

16                 Arina V. Nostaeva, MD

17                 Sestroretsk, 9 Borisova str., Saint Petersburg, Russia, 197706

18                 [avnostaeva@gmail.com](mailto:avnostaeva@gmail.com)

19  
20  
21          **ABSTRACT**

22  
23          The course of COVID-19 is characterized by wide variability, with genetics playing a  
24          contributing role. Through large-scale genetic association studies, a significant link between  
25          genetic variants and disease severity was established. However, individual genetic variants  
26          identified thus far have shown modest effects, indicating a polygenic nature of this trait. To  
27          address this, a polygenic risk score (PRS) can be employed to aggregate the effects of  
28          multiple single nucleotide polymorphisms (SNPs) into a single number, allowing practical  
29          application to individuals within a population. In this work, we investigated the performance  
30          of a PRS model in the context of COVID-19 severity in 1085 Russian participants using low-  
31          coverage NGS sequencing. By developing a genome-wide PRS model based on summary  
32          statistics from the COVID-19 Host Genetics Initiative consortium, we demonstrated that the  
33          PRS, which incorporates information from over a million common genetic variants, can  
34          effectively identify individuals at significantly higher risk for severe COVID-19. The findings  
35          revealed that individuals in the top 10% of the PRS distribution had a markedly elevated risk  
36          of severe COVID-19, with an odds ratio (OR) of 2.2 (95% confidence interval (CI): 1.3-3.3, p-  
37          value=0.0001). Furthermore, incorporating the PRS into the prediction model significantly  
38          improved its accuracy compared to a model that solely relied on demographic information (p-  
39          value < 0.0001). This study highlights the potential of PRS as a valuable tool for identifying  
40          individuals at increased risk of severe COVID-19 based on their genetic profile.

41  
42          **INTRODUCTION**

43  
44          COVID-19, also known as coronavirus infection, is a contagious illness caused by the severe  
45          acute respiratory syndrome-coronavirus-2 (SARS-CoV-2). The majority of individuals who  
46          contract the virus exhibit mild to moderate respiratory symptoms and can recover without  
47          requiring specific medical treatment. However, in certain cases, the disease can manifest in  
48          a severe form, requiring medical intervention [1,2].

49

50 Apart from external factors like virus characteristics and the effectiveness of public health,  
51 certain host-related factors such as older age, male gender, and pre-existing chronic  
52 diseases like hypertension and diabetes have been associated with susceptibility and  
53 severity of COVID-19 [3,4]. However, these risk factors alone cannot fully explain the wide  
54 variation observed in the disease severity. The course of COVID-19 can range from  
55 asymptomatic cases to acute respiratory distress and even death [5,6]. Early in the  
56 pandemic, it was noted that clinical factors alone were insufficient to account for the  
57 variability in disease severity across individuals, as severe cases were observed in young  
58 people without apparent predisposing factors, often within families [7]. This suggests that  
59 human genetics may play a role in the development of the disease.

60

61 To gain insights into the aetiology of COVID-19, large-scale genetic association studies  
62 incorporating both rare and common genetic variants have employed various study designs.  
63 These investigations, along with subsequent follow-up studies, have expanded our  
64 understanding of the disease and provided potential avenues for its treatment. The COVID-  
65 19 Host Genetics Initiative (HGI) was established to identify genetic loci that impact the  
66 severity and susceptibility of COVID-19 [8]. This global effort aims to conduct a meta-  
67 analysis of multiple COVID-19 genome-wide association studies (GWAS), and to identify  
68 significant single nucleotide polymorphisms (SNPs) associated with infection, hospitalization,  
69 and mortality. Through comparisons of genomes of millions of COVID-19 patients and  
70 healthy individuals, these studies have implicated genetic variants in 13 loci associated with  
71 the severity of the disease [9]. The COVID-19-associated genetic variants could be related  
72 to the regulation of processes such as innate antiviral defence signalling, regulation of  
73 inflammatory organ damage, and upregulation of cell receptors [10]. Modulation of these  
74 pathways can impact susceptibility to infection and subsequent disease manifestation [11].

75

76 The effects of individual genetic variants identified so far are generally small, consistent with  
77 the polygenic architecture of this trait. An individual who tests negative for a specific risk  
78 variant may still have a high genetic risk due to other unmeasured genetic factors. While  
79 each single variant only explains a small portion of the risk for severe COVID-19, combining  
80 multiple genetic variants into a polygenic risk score (PRS) can offer a better prediction of the  
81 risk. PRS allows for the aggregation of the effects of multiple SNPs into a single score, which  
82 can be practically applied to individuals within a population [12]. Conventionally, a polygenic  
83 score is defined as a weighted linear combination of allele counts for SNPs observed in an  
84 individual's genome. The PRS model consists of the weights of a set of SNPs, with the  
85 weights proportional to the estimated effects of the SNPs on the trait being studied [13].

86

87 Modern polygenic risk score models for human traits are typically estimated using summary  
88 statistics obtained from a genome-wide association meta-analysis (GWAMA) and a  
89 reference panel reflecting linkage disequilibrium (LD) in the population [13,14]. Over the past  
90 decade, PRS predictive performance has significantly improved due to larger GWAS sample  
91 sizes and advancements in methods for variable selection and effect estimation [15–24].  
92 Polygenic scores can be utilized to rank individuals within a group based on their genetic  
93 predisposition to a disease [25–27]. This approach considers an individual's genetic  
94 predisposition relative to the genetic predisposition of others in the same group, often  
95 expressed as a percentile representing where the individual's PRS falls within the overall  
96 distribution of the group's PRS.

97

98 Several studies have explored the development and application of PRS using variants  
99 associated with COVID-19, revealing clear associations between PRS and the risk of severe  
100 disease. However, most PRS models have been applied to cohorts consisting predominantly  
101 of individuals of Western European ancestry [28–31]. Using 1,582 SARS-CoV-2 positive  
102 participants from the UK Biobank (1,018 with severe COVID-19 and 564 without severe  
103 COVID-19) and 64 SNPs for PRS calculation, Dite et al. developed and validated a clinical  
104 and genetic model for predicting the risk of severe COVID-19. Only 13% of participants from  
105 this study were non-white, and PRS alone had an area under the receiver operating  
106 characteristic curve (AUC) of 68% [31].

107

108 While one recent study included African and South Asian groups, the associations with  
109 COVID-19 outcomes were limited by applying a PRS based on only six SNPs [32]. Another  
110 study that considered non-Western European populations was constrained by its focus on a  
111 specific Russian cohort (athletes) and also included only six genetic polymorphisms in the  
112 PRS assessment [33]. The multi-ethnic approach implemented in a very recent paper using  
113 UK biobank data, allowed the applicability of PRS, based on 17 SNPs, to diverse  
114 populations, with the severity model performing well within Black and Asian cohorts [34,35].  
115 Overall, results highlight the potential of PRS as a predictive marker for disease severity and  
116 provide further support for its application in risk stratification and personalized healthcare  
117 approaches in the context of COVID-19.

118

119 Our study aimed to investigate the performance of the PRS model in the Russian population.  
120 The genomes of study participants (347 individuals with severe COVID-19 and 738 with  
121 moderate or without disease) were assessed using low-coverage (with mean depth x3)  
122 sequencing. Next, we developed a genome-wide PRS model for COVID-19 severity using  
123 the summary statistics from the COVID-19 host genetics initiative consortium. We  
124 demonstrated that PRS, incorporating information from more than a million common genetic  
125 variants, for COVID-19 severity can identify individuals with markedly elevated risk of severe  
126 COVID-19 course: OR=2.2 (95% confidence interval (CI): 1.3-3.3, p-value=0.0001) for  
127 individuals in the top 10% of the PRS distribution, and produces a significant improvement in  
128 the quality of prediction (p-value < 0.0001) compared to a model including only demographic  
129 information.

130

## 131 **RESULTS**

132

### 133 **Participant Characteristics**

134

135 The participants of the study were the patients of the infectious disease department of the  
136 St. Petersburg State Health Care Institution "City Hospital No. 40, Kurortny District" who  
137 were admitted for treatment with coronavirus infection (confirmed by polymerase chain  
138 reaction), and healthy individuals. Healthy individuals are defined as people who did not  
139 require COVID-19 medical treatment at the time of the study (between April 2020 and March  
140 2022).

141

142 Table 1 shows the participants' characteristics. Of the 1085 participants, 479 (44%) were  
143 female, with a mean age of 60 years, while for 606 (56%) males the mean age was equal to  
144 56 years. Overall, 895 (82%) of all participants had COVID-19, of which 347 (39%) had

145 severe COVID-19. Separation according to the severity of the disease was carried out  
 146 according to the following criteria: the case group included 347 patients (214 men and 133  
 147 women, 63±15 years) with lung damage more than 50% (computed tomography (CT)-3 and  
 148 CT-4), the control group included 738 patients (392 men and 346 women, 56±16 years), with  
 149 lung damage less than 50% or without COVID-19.

150  
 151

**Table 1. The demographic and clinical characteristics of the participants.**

| Characteristics                         | Male                                          | Female                                        |
|-----------------------------------------|-----------------------------------------------|-----------------------------------------------|
| Mean age (sd)                           | 56 (15)                                       | 60 (16)                                       |
| Healthy individuals                     | 116                                           | 74                                            |
| Patients required treatment by severity | CT-1: 81<br>CT-2: 195<br>CT-3: 213<br>CT-4: 1 | CT-1: 71<br>CT-2: 201<br>CT-3: 130<br>CT-4: 3 |
| Outcome                                 | death: 93<br>recovery or no disease: 513      | death: 53<br>recovery or no disease: 426      |

152 Abbreviations: *CT* computed tomography, where CT-1 – mild form of pneumonia with areas  
 153 of “frosted glass”, the severity of pathological changes less than 25%; CT-2 – moderate  
 154 pneumonia, 25-50% of lungs are affected; CT-3 – moderately severe pneumonia, 50-75% of  
 155 lungs are affected; CT-4 – severe form of pneumonia, >75% of lungs are affected.

156

157 **Low coverage sequencing and imputation**

158

159 For all samples low coverage sequencing, also called LP-WGS (low-pass whole genome  
 160 sequencing), was performed with a depth of x3 genome coverage. LP-WGS is the type of  
 161 WGS with genome coverage from x0.5 to x5 [36,37]. Due to low-coverage data often  
 162 having poor genotype quality and resulting in high missing genotype rates, the genotype  
 163 likelihoods (GL) need to be updated using a reference panel for more accurate genotype  
 164 imputation [38,39]. We used a recent method called GLIMPSE, which performs haplotype  
 165 phasing and genotype imputation for LP-WGS data through a Gibbs sampling procedure,  
 166 leading to improved accuracy [38]. As a reference panel, we used the 1000 Genomes data  
 167 [40]. To evaluate the efficiency of LP-WGS within PRS, we calculated PRS values for a  
 168 sample (not included in the study population) sequenced 45 times (in each of the batches to  
 169 control the quality of the sequencing process). The coefficient of variation (CV) for PRS  
 170 values was equal to 0.5% demonstrating a good method performance.

171

172 **Overview of the approach**

173

174 Computation of PRSs requires both genotype data of target individuals and the PRS model.  
 175 To build the PRS model we used summary statistics from the COVID-19 Host Genetics  
 176 Initiative consortium (release 7) [8]. These results were obtained by the meta-analysis, which  
 177 combined the results of 60 individual studies from 25 countries, with a total of 18,000 severe

178 cases of COVID-19 and more than a million controls who either did not have a severe  
 179 disease course or were not affected by COVID-19 during the study period. From the  
 180 obtained summary statistics, we generated the PRS model using the Bayesian approach  
 181 SBayesR with default parameters, implemented in the GCTB software [19,41,42]. Finally, we  
 182 calculated individual PRS values using the PRS model (Fig. 1, Methods).  
 183

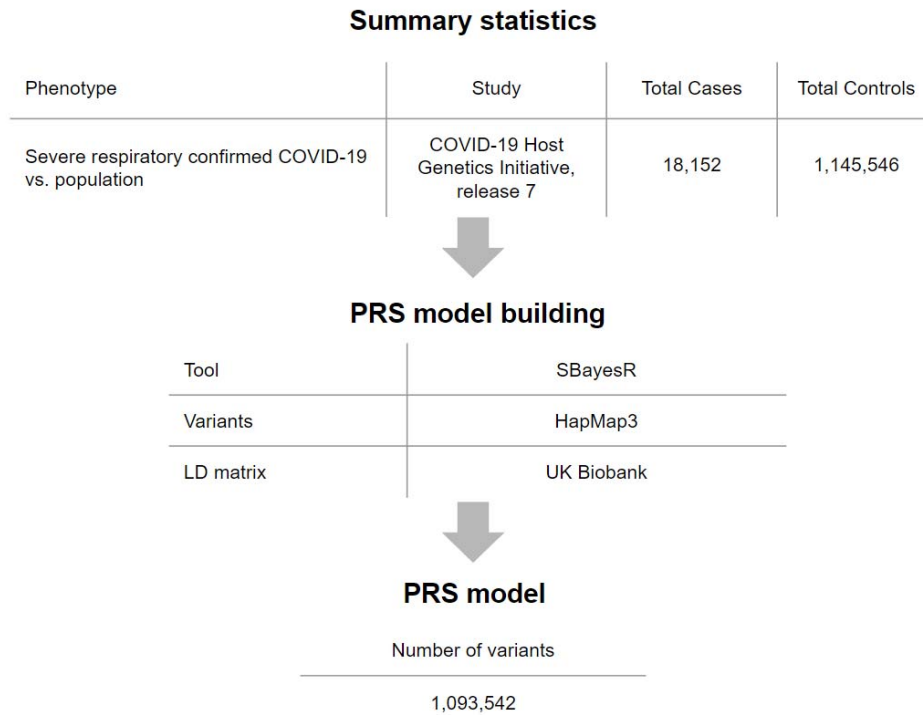

184  
 185 **Figure 1. Study design and workflow.** The PRS model for COVID-19 severity was derived  
 186 by combining summary association statistics from the COVID-19 Host Genetics Initiative  
 187 consortium and a linkage disequilibrium reference panel of 50,000 individuals of European  
 188 ancestry from the UK Biobank data set. As a computational algorithm, SBayesR was used,  
 189 which is a Bayesian approach to calculate a posterior mean effect for all variants based on a  
 190 prior (effect size in the previous GWAS) and subsequent shrinkage based on linkage  
 191 disequilibrium. PRS model was restricted by a list of variants from HapMap3 and included  
 192 about one million variants.

193

194 **Testing associations between PRS and severe COVID-19**

195

196 We compared the distributions of PRS values between severe cases and the control group  
 197 combining the milder forms of COVID-19 and healthy individuals (Fig. 2). Comparison of the  
 198 mean PRS values, performed using Student's t-test for two independent samples, showed  
 199 significant difference ( $p$ -value=1.2e-06).

200

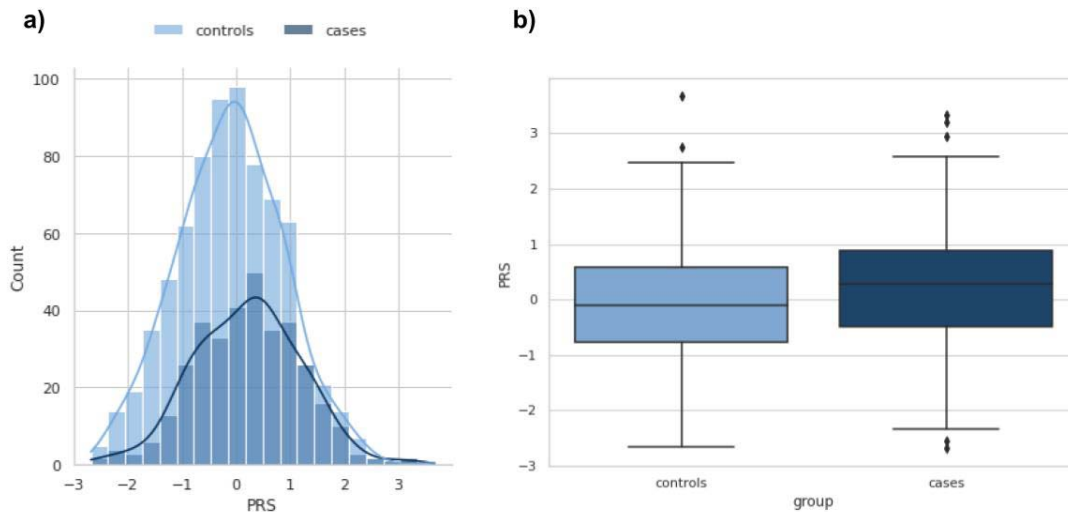

201  
 202  
 203  
 204  
 205  
 206  
 207  
 208  
 209  
 210  
 211  
 212  
 213

**Figure 2. Comparison of distributions of PRS values between the groups with and without severe COVID-19.** a) Distribution of PRS in the groups with ( $N_{\text{cases}}=347$ ) and without ( $N_{\text{controls}}=738$ ) severe COVID-19. The x-axis represents PRS, with values scaled to a mean of 0 and a standard deviation of 1 (in the total sample) to facilitate interpretation. b) PRS values among cases versus controls. Within each box plot, the horizontal lines reflect the median, the top, and bottom of each box reflect the interquartile range, and the whiskers reflect the rest of the distribution, except for points that are determined to be “outliers”.

Across the study population, PRS was normally distributed with the risk of severe COVID-19 rising in the right tail of the distribution, from 17% in the lowest decile to around 47% in the highest decile (Fig. 3).

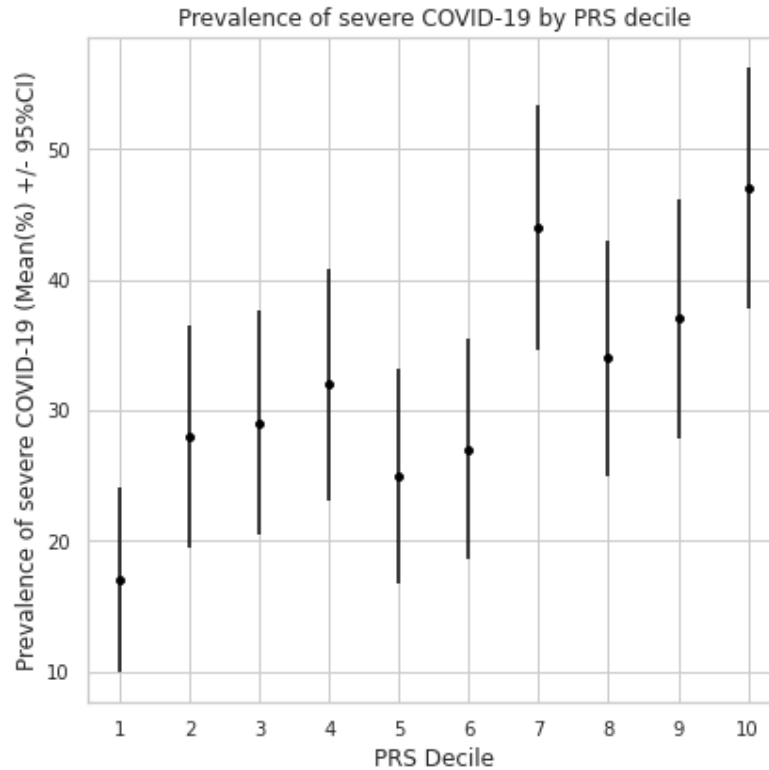

214  
 215 **Figure 3. Prevalence of the severe COVID-19 according to PRS decile.** All participants  
 216 (N=1,085) were stratified by decile of the PRS distribution. The average prevalence in  
 217 percent and 95% CI within each decile are displayed.

218  
 219 Next, we found that 20% of the population with the highest PRS values had inherited a  
 220 genetic predisposition that conferred OR=1.8 for severe COVID-19 (95% CI: 1.3-2.4, p-  
 221 value=0.0003) in comparison with all others. The 10% of the population with the highest  
 222 PRS values had an OR=2.2 for COVID-19 (95% CI: 1.3-3.3, p-value=0.0001).

223  
 224 **Evaluating the relationship between PRS and COVID-19 outcome**

225  
 226 The severe form of the disease is associated with an increased risk of death. To assess how  
 227 much the risk of death is associated with an increased PRS value, next, we calculated the  
 228 odds ratio (OR) for death between the group with the highest PRS values (10%) and all  
 229 others. The resulting OR was 1.9 (95% CI: 1.1-3.1) with p-value = 0.018. Thus, in the group  
 230 with the highest PRS values, the probability of death due to severe disease was almost  
 231 doubled.

232  
 233 We also compared the mean PRS values for groups with different COVID-19 outcomes  
 234 (death vs no death or no disease). Results showed significant difference in mean PRS (p-  
 235 value = 0.02, Fig. 4).

236

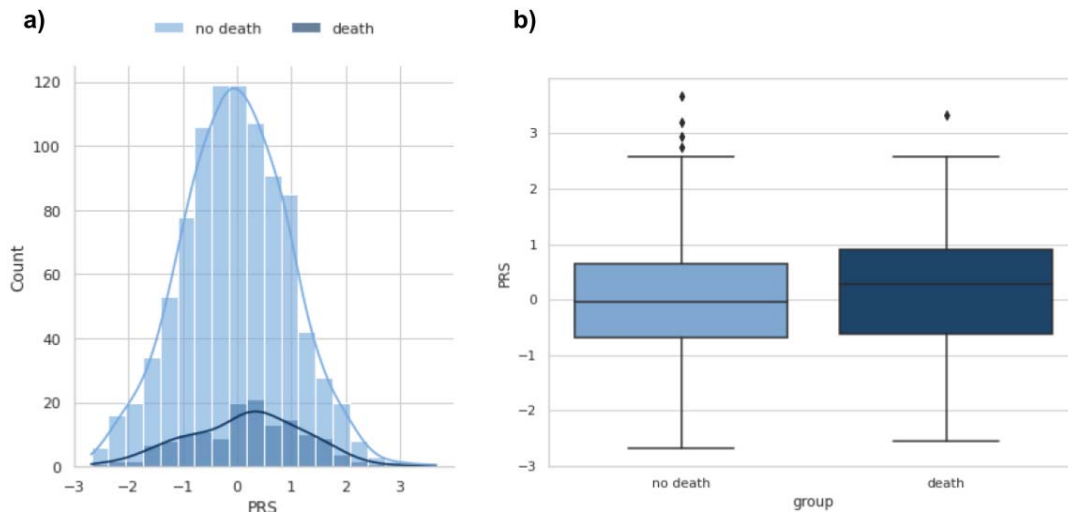

237  
 238 **Figure 4. Comparison of distributions of PRS values between the groups with and**  
 239 **without death outcome.** a) Distribution of PRS in the groups with ( $N_{\text{death}}=146$ ) and without  
 240 ( $N_{\text{no death}}=939$ ) death outcome of COVID-19. The x-axis represents PRS, with values scaled  
 241 to a mean of 0 and a standard deviation of 1 (in the total sample) to facilitate interpretation.  
 242 b) PRS values among cases versus controls. Within each box plot, the horizontal lines  
 243 reflect the median, the top, and bottom of each box reflect the interquartile range, and the  
 244 whiskers reflect the rest of the distribution, except for points that are determined to be  
 245 “outliers”.

246  
 247 Next, we hypothesized that PRS for severe COVID-19 would be associated with a higher  
 248 risk of severe COVID-19 in early age. In Kaplan–Meier analyses, which is a non-parametric  
 249 statistic used to estimate the survival function from lifetime data, we divided the sample into  
 250 three groups: 10% of all individuals with the highest PRS values, 10% of all individuals with  
 251 the lowest PRS values and the rest (Fig. 5). The analysis showed that people from the group  
 252 of high PRS values start to have increased risk in comparison with other groups already  
 253 before the age of 40 years ( $p\text{-value}<3.7e\text{-}10$  for the log rank test). For example, the average  
 254 risk of a severe course, which is reached at the age of 60 years, in the group with the  
 255 highest PRS is reached already at 50 years of age.

256



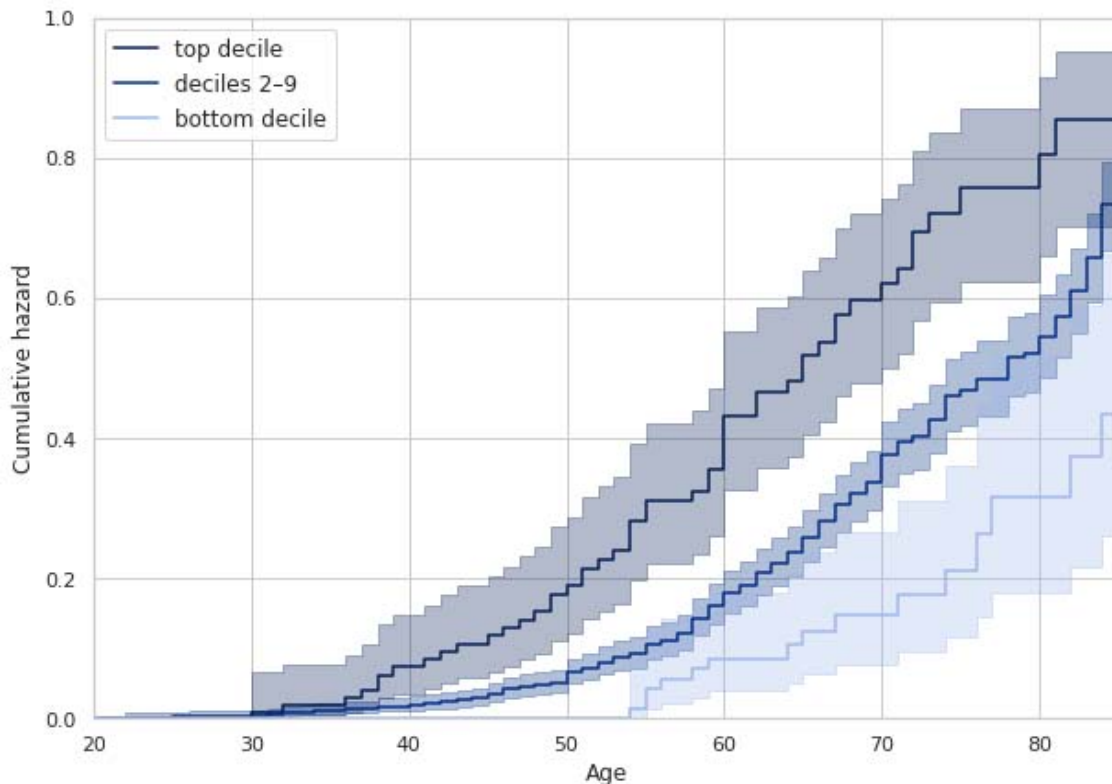

257  
 258 **Figure 5. Association of PRS with Incident Severe COVID-19.** All participants (N=1,085)  
 259 were stratified, based on their PRS, into three categories: bottom decile, deciles 2–9, and  
 260 top decile. Incident severe COVID-19 is plotted according to the PRS category.

261  
 262 **Receiver Operating Curve (ROC) analysis**

263  
 264 Next we analysed the association between PRS and severe COVID-19 using a multivariate  
 265 logistic regression model adjusted for sex, age, and the first 10 principal components of  
 266 genetic variation. In the adjusted model, a significant association between PRS and severe  
 267 COVID-19 was found: OR=1.48 per standard deviation (95% CI: 1.3-1.7 with p-value <  
 268 0.0001). High values of PRS (the 10% of PRS distribution) were associated with the  
 269 adjusted OR=2.7 (95% CI: 1.8-4.2, p-value < 0.0001).

270  
 271 Analyses showed significant (p-value < 0.0001) improvements in AUC with the addition of  
 272 PRS to the base model containing only the demographic predictors. Figure 6 shows that a  
 273 model predicting the risk of severe COVID-19 had an AUC of 65% (95% CI: 62-69% by the  
 274 formula given by Hanley and McNeil [43]) for a model excluding PRS, and it increased up to  
 275 67% (95% CI: 64-71%) when PRS was included.

276

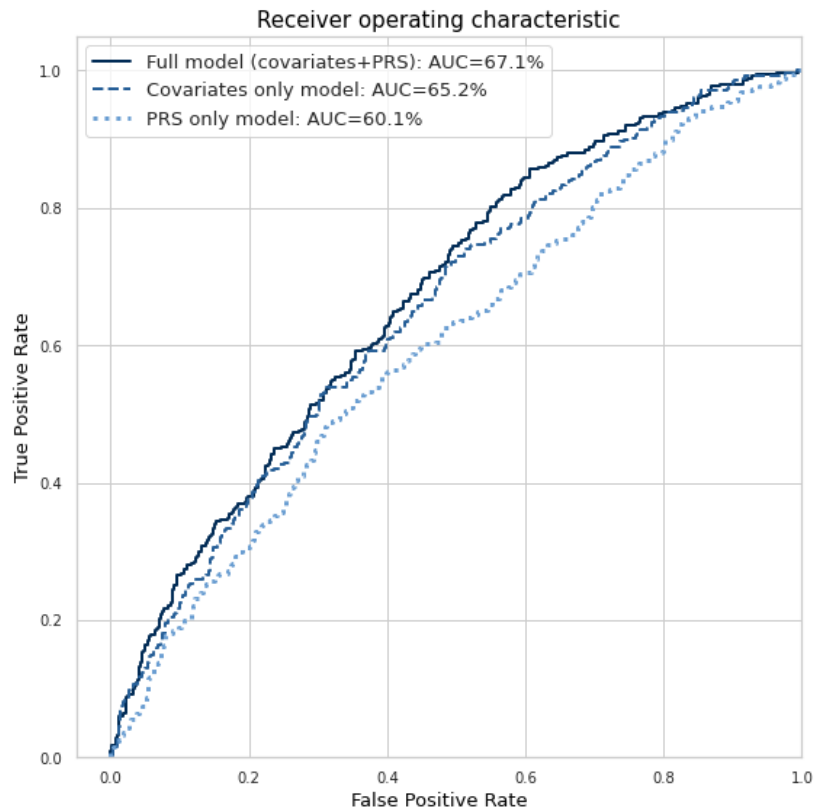

277

278

279

280

281

282

283

284

285

286

287

288

289

290

291

292

293

294

295

296

297

298

299

300

301

302

**Figure 6. The comparison of receiving operating curves for three logistic regression models.** The full model included the demographic predictors (sex and age), PRS, and the first 10 principal components of genetic variation, while the covariates-only model excluded PRS.

## DISCUSSION

In this study, we constructed a polygenic risk model for the prediction of the severity of COVID-19 and applied it to a target cohort of 1085 Russian participants. Comparing the distributions of PRS, incorporating information from one million common genetic variants, between the case and control groups revealed significant differences, indicating meaningful associations between PRS and corresponding COVID-19 outcomes. We also demonstrated the potential of LP-WGS with coverage less than  $\times 5\times$  to be used for predicting the severity of COVID-19.

Our main objective was to evaluate the predictive ability of PRS for COVID-19 severity. To achieve this, we developed a logistic regression model that included only demographic and technical covariates and the full model that also incorporated PRS. Comparison between these models demonstrated that incorporating PRS significantly enhanced the predictive accuracy. These findings align with a previous analysis made by Huang et al., where PRS values for severe COVID-19 were constructed by using 112 SNPs in 430,582 participants from the UK Biobank study [29]. In this work, AUC was calculated for a model including only demographic and clinical parameters, and for the full model, which also included PRS. For the first model, the AUC was 0.789, while in the full mode, the AUC was 0.794 (p-value=0.002 for increment in AUC). Higher overall prediction accuracy of the model could be

303 attributed to utilisation of information on comorbidities (cardiovascular disease, hypertension,  
304 diabetes, chronic respiratory infections, asthma, and chronic obstructive pulmonary disease).  
305 Our PRS, based on approximately one million SNPs, gave a comparable improvement in  
306 AUC (0.5% vs 2%, respectively). The higher contribution of PRS in our case can be  
307 explained by the much larger number of genetic variants used but also by the absence of  
308 clinical factors in our model. Indeed, it is often observed that adding a predictor to a model  
309 having a high AUC improves it by an amount smaller than that that could be achieved by  
310 adding the same factor to a poorer model.

311

312 Furthermore, stratifying individuals by PRS quantiles revealed an association with a  
313 distinctive risk of severe COVID-19 in resulting groups. The highest PRS categories  
314 generally exhibited higher (up to 2.2 for the top 10% PRS) odds ratios. This genetic basis for  
315 differences in disease severity among individuals also extended to the occurrence of  
316 fatalities due to COVID-19 (OR=1.9 for the top 10% PRS). These results demonstrate that  
317 polygenic risks can be employed to stratify patients and assess their risk of severe disease  
318 and mortality related to COVID-19.

319

320 Additional survival analysis using the non-parametric Kaplan-Meier estimation revealed that  
321 the highest risk categories as defined by PRS not only exhibited higher odds ratios for  
322 COVID-19 severity but also experienced an earlier onset of increased risk compared to the  
323 mean- and low-risk categories. These findings provide insights into both the overall risk for  
324 severe COVID-19 and how the risk varies by age.

325

326 These results can have practical implications for protecting individuals with a greater genetic  
327 vulnerability during potential future outbreaks. Targeted public health interventions, such as  
328 shielding measures, closer monitoring, protection from high-risk frontline work, and  
329 prioritization for vaccination, could help to mitigate the associated risk. Hospital-based  
330 applications of PRS could facilitate the screening of COVID-19 patients and aid in the early  
331 detection of severe disease [28]. Moreover, informing patients about their increased  
332 polygenic risk has shown some evidence of positive behavioural impact [44], potentially  
333 leading to a decrease in risk-taking behaviours and promoting better outcomes.

334

335 A few limitations of the study should be noted. Firstly, despite the multi-ethnic and global  
336 nature of the HGI Release 7 meta-analysis, the participants were mostly of Western  
337 European descent, which may have affected the accuracy of the predictions in non-Western  
338 European populations [9]. Additionally, the lack of detailed clinical data led to the use of CT  
339 scans as a criterion for disease severity, which could have introduced some inaccuracy in  
340 the classification of the outcome measure for some participants.

341

## 342 **METHODS**

343

### 344 **Study population and genetic sequencing**

345

346 As part of the COVID-19 study, biomaterial (blood) and clinical data from COVID-19 patients  
347 hospitalized in the infectious disease department of the St. Petersburg State Budgetary  
348 Healthcare Institution "City Hospital No. 40 of Kurortny District" were collected. In this work,  
349 low-coverage (x2-5) sequencing was performed for 1085 samples divided into 45 batch  
350 sizes. Low-coverage sequencing, also called LP-WGS (low-pass whole genome

351 sequencing), is a low-cost, high-throughput DNA sequencing technology used to accurately  
352 detect genetic variation in the genomes of multiple species [45]. Using imputation algorithms,  
353 this technology provides high variant detection accuracy with very low sequence coverage.  
354 LP-WGS and subsequent imputation yield more accurate genotypes than imputation using  
355 genotyping data, allowing for increased power in GWAS studies and more accurate results  
356 in polygenic risk studies [46].

357

358 Prior to sequencing, preliminary analysis and quality control of the case database were  
359 performed, and preliminary analysis of samples from each batch was performed to exclude  
360 bias for any of the sample characteristics: age, sex, and case/control.

361

362 Genome DNA isolation was performed with QIAcube, using QIAamp DNA Blood Mini Kit.  
363 DNA concentration is measured with Promega QuantiFluor dsDNA System. Library  
364 preparation was done using Roche KAPA HyperPlus Kit. Quality control electrophoresis was  
365 done on QIAxcel station using QIAxcel High Resolution Kit. Circularization was made with  
366 MGIEasy Circularization Kit. Sequencing was done on MGISEQ-2000 sequencing machine  
367 with DNBSEQ-G400RS High-throughput Sequencing Set (FCL PE150, 540 G).

368

### 369 **Variant calling, imputation, and quality control**

370

371 Quality analysis (FastQC) [47], alignment (BWA) [48], deduplication (samtools), and variant  
372 collation (bcftools) were performed for the reads obtained from sequencing [49]. Imputation  
373 of the resulting data was then performed using the GLIMPSE tool [38], which allows  
374 imputation of low-coverage sequencing data. To improve imputation quality, only bi-allelic  
375 sites were retained from the LP-WGS BAM data and processed with bcftools. Then iterative  
376 refinement of GL using the reference panels with segmentation size of 2 Mb with buffer size  
377 of 200 kb produced imputed dosages and multiple chunks within each chromosome were  
378 ligated. A panel of 1000 Genomes with high coverage [40], including high-quality SNV- and  
379 INDELS from over 3,000 samples, was used as a reference sample.

380

381 Then, we filtered imputed variants by an imputation INFO score, where variants with  
382 score  $\leq 0.7$  and a minor allele frequency  $\leq 0.1\%$  were removed from the analysis [9,13].  
383 We focused on the variants and individuals with a call rate of more than 90%. We also  
384 removed close relatives from the analysis. We used the KING-robust method to identify  
385 relatives [50]. Using a threshold (kinship  $> 0.125$ ), we found pairs of first- and second-degree  
386 relatives. We restricted our analyses to a list of variants from HapMap3 [51], which are  
387 included in the PRS models. PLINK 1.90 software [52] was utilised for all genotype  
388 extraction and quality control.

389

### 390 **Establishing COVID-19 outcomes**

391

392 The severity of the course was divided according to the following criteria: the case group  
393 included samples with lung lesions greater than 50% (computed tomography (CT)-3 and CT-  
394 4), while the control group included all other samples. As a result, the case group included  
395 347 patients (214 men and 133 women,  $63 \pm 15$  years) with lung damage more than 50%  
396 (computed tomography (CT)-3 and CT-4), the control group included 738 patients (392 men  
397 and 346 women,  $56 \pm 16$  years), with lung damage less than 50% or without COVID-19.

398

399 **Construction of PRS models**

400

401 The calculation of PRSs relies on both genotype data from the target individuals and a PRS  
402 model. To derive a PRS model, GWAS are used to estimate the effect sizes of SNPs [53].  
403 However, the GWAS gives the marginal effect size for each SNP estimated by a regression  
404 model that ignores linkage disequilibrium (LD) structure. As a result, to construct a PRS  
405 model that incorporates multiple SNPs, the SNP effects must be re-estimated while  
406 accounting for LD structure.

407

408 As the summary statistics, we used summary statistics from the COVID-19 Host Genetics  
409 Initiative consortium (release 7). These results were obtained by the meta-analysis, which  
410 combined the results of 60 individual studies from 25 countries.

411

412 To re-weight the effect sizes, we used SBayesR, a software tool that has demonstrated  
413 superior performance compared to similar tools [19]. This tool re-weights the effects of each  
414 variant based on the marginal estimate of its effect size, statistical strength of association,  
415 the degree of correlation between the variant and other variants nearby, and tuning  
416 parameters. It also requires a GCTB-compatible LD matrix file based on individual-level data  
417 from a reference population, and for this analysis, we used a shrunk sparse GCTB LD matrix  
418 from 50,000 individuals of European ancestry in the UK Biobank dataset [41].

419

420 PRS values were calculated as a weighted sum of allele counts:

$$PRS_i = \sum_j \beta_j G_{ij}$$

421 with  $\beta_j$  the re-weighted effect size of the  $j$ th SNP,  $G_{ij}$  the genotype of the  $j$ th SNP for  
422  $i$ th individual. PLINK 1.90 software [52] was utilised for PRS calculation.

423

424 **Statistical analysis and association testing**

425

426 Logistic regression of PRS categories against COVID-19 severity outcomes was then  
427 conducted using R [54] and Python3 [55], fully adjusted for covariates, such as sex and age.  
428 Data on comorbidities were not available for the majority of patients, as well as other clinical  
429 data, so parameters for these were not included in the model to cover as much data as  
430 possible. The first 10 principal genetic components (PCs) were also included as covariates  
431 to adjust for population genetic structures and avoid bias, as per current recommendations  
432 [13].

433

434 The discriminative power of models in identifying high-risk individuals was then assessed  
435 using receiver operating curve (ROC) analysis. Area under the ROC (AUC) was calculated  
436 for full models (consisting of covariates and PRS) and base models (covariates only). The  
437 confidence interval for AUC was calculated using the formula given by Hanley and McNeil  
438 [43]. Increment in AUC ( $\Delta AUC$ ) was reported based on the difference between the two  
439 models, reported as the discriminative or predictive power conferred by PRS. The  
440 permutation test for differences between classifiers was used to estimate the significance (p-  
441 value) of an increment in AUC.

442

443 Once PRS was calculated, individuals were separately stratified into quintiles for  
444 susceptibility and severity PRS, then categorised into low genetic risk (decile 1, bottom 10%  
445 of cohort), intermediate risk (decile 2–9, middle 80%) and high risk (decile 10, top 10%) for  
446 each outcome. In each group, we estimated the cumulative hazard curve using the non-  
447 parametric method called the Kaplan-Meier estimator [56]. For each pair of groups, the log  
448 rank test was applied, which is the statistical test for comparing the survival distributions of  
449 two or more groups.

450

#### 451 **DATA AND CODE AVAILABILITY**

452

453 Personal genetic and clinical data are under restrictions and are available through  
454 collaboration with the St. Petersburg State Health Care Institution "City Hospital No. 40,  
455 Kurortny District" hospital.

456

#### 457 **ACKNOWLEDGEMENTS**

458 The authors are grateful to the study participants and the staff from the St. Petersburg State  
459 Health Care Institution "City Hospital No. 40, Kurortny District" hospital. The authors would  
460 like to thank all authors of the included studies for their valuable contributions to data  
461 collection. This work was supported by Saint Petersburg State University, project ID:  
462 94029859.

463

#### 464 **CONFLICT OF INTEREST**

465

466 YSA is a co-owner of PolyKnomics BV, a private organization providing services, research,  
467 and development in the field of computational and statistical genomics. YSA is currently a  
468 full-time employee of GSK. The other authors declare that they have no competing interests.

469

#### 470 **REFERENCES**

471

- 472 1. Bose S, Adapa S, Aeddula NR, Roy S, Nandikanti D, Vupadhyayula PM, et al. Medical  
473 Management of COVID-19: Evidence and Experience. *J Clin Med Res.* 2020;12: 329–  
474 343.
- 475 2. Bevova MR, Netesov SV, Aulchenko YS. The New Coronavirus COVID-19 Infection.  
476 *Mol Gen Microbiol Virol.* 2020;35: 53–60.
- 477 3. COVID-19 National Preparedness Collaborators. Pandemic preparedness and COVID-  
478 19: an exploratory analysis of infection and fatality rates, and contextual factors  
479 associated with preparedness in 177 countries, from Jan 1, 2020, to Sept 30, 2021.  
480 *Lancet.* 2022;399: 1489–1512.
- 481 4. Biswas M, Rahaman S, Biswas TK, Haque Z, Ibrahim B. Association of Sex, Age, and  
482 Comorbidities with Mortality in COVID-19 Patients: A Systematic Review and Meta-  
483 Analysis. *Intervirology.* 2020; 1–12.
- 484 5. Wang Y, Wang Y, Chen Y, Qin Q. Unique epidemiological and clinical features of the  
485 emerging 2019 novel coronavirus pneumonia (COVID-19) implicate special control  
486 measures. *J Med Virol.* 2020;92: 568–576.
- 487 6. Fricke-Galindo I, Falfán-Valencia R. Genetics Insight for COVID-19 Susceptibility and

- 488           Severity: A Review. *Front Immunol.* 2021;12: 622176.
- 489   7.   Yousefzadegan S, Rezaei N. Case Report: Death due to COVID-19 in Three Brothers.  
490       *Am J Trop Med Hyg.* 2020;102: 1203–1204.
- 491   8.   COVID-19 Host Genetics Initiative. The COVID-19 Host Genetics Initiative, a global  
492       initiative to elucidate the role of host genetic factors in susceptibility and severity of the  
493       SARS-CoV-2 virus pandemic. *Eur J Hum Genet.* 2020;28: 715–718.
- 494   9.   Mapping the human genetic architecture of COVID-19. *Nature.* 2021;600: 472–477.
- 495   10.   Pairo-Castineira E, Clohisey S, Klaric L, Bretherick AD, Rawlik K, Pasko D, et al.  
496       Genetic mechanisms of critical illness in COVID-19. *Nature.* 2021;591: 92–98.
- 497   11.   Velavan TP, Pallerla SR, Rüter J, Augustin Y, Kremsner PG, Krishna S, et al. Host  
498       genetic factors determining COVID-19 susceptibility and severity. *EBioMedicine.*  
499       2021;72: 103629.
- 500   12.   Dudbridge F. Power and predictive accuracy of polygenic risk scores. *PLoS Genet.*  
501       2013;9: e1003348.
- 502   13.   Choi SW, Mak TS-H, O'Reilly PF. Tutorial: a guide to performing polygenic risk score  
503       analyses. *Nat Protoc.* 2020;15: 2759–2772.
- 504   14.   de los Campos G, Gianola D, Allison DB. Predicting genetic predisposition in humans:  
505       the promise of whole-genome markers. *Nat Rev Genet.* 2010;11: 880–886.
- 506   15.   Vilhjálmsson BJ, Yang J, Finucane HK, Gusev A, Lindström S, Ripke S, et al. Modeling  
507       Linkage Disequilibrium Increases Accuracy of Polygenic Risk Scores. *Am J Hum Genet.*  
508       2015;97: 576–592.
- 509   16.   Zhu X, Stephens M. BAYESIAN LARGE-SCALE MULTIPLE REGRESSION WITH  
510       SUMMARY STATISTICS FROM GENOME-WIDE ASSOCIATION STUDIES. *Ann Appl*  
511       *Stat.* 2017;11: 1561–1592.
- 512   17.   Khera AV, Chaffin M, Aragam KG, Haas ME, Roselli C, Choi SH, et al. Genome-wide  
513       polygenic scores for common diseases identify individuals with risk equivalent to  
514       monogenic mutations. *Nat Genet.* 2018;50: 1219–1224.
- 515   18.   Choi SW, O'Reilly PF. PRSice-2: Polygenic Risk Score software for biobank-scale data.  
516       *Gigascience.* 2019;8. doi:10.1093/gigascience/giz082
- 517   19.   Lloyd-Jones LR, Zeng J, Sidorenko J, Yengo L, Moser G, Kemper KE, et al. Improved  
518       polygenic prediction by Bayesian multiple regression on summary statistics. *Nat*  
519       *Commun.* 2019;10: 5086.
- 520   20.   Li R, Chang C, Tanigawa Y, Narasimhan B, Hastie T, Tibshirani R, et al. Fast numerical  
521       optimization for genome sequencing data in population biobanks. *Bioinformatics.*  
522       2021;37: 4148–4155.
- 523   21.   Privé F, Arbel J, Vilhjálmsson BJ. LDpred2: better, faster, stronger. *Bioinformatics.*  
524       2021;36: 5424–5431.
- 525   22.   Ojavee SE, Kousathanas A, Trejo Banos D, Orliac EJ, Patxot M, Läll K, et al. Genomic  
526       architecture and prediction of censored time-to-event phenotypes with a Bayesian  
527       genome-wide analysis. *Nat Commun.* 2021;12: 2337.

- 528 23. Wand H, Lambert SA, Tamburro C, Iacocca MA, O'Sullivan JW, Sillari C, et al.  
529 Improving reporting standards for polygenic scores in risk prediction studies. *Nature*.  
530 2021;591: 211–219.
- 531 24. Lambert SA, Gil L, Jupp S, Ritchie SC, Xu Y, Buniello A, et al. The Polygenic Score  
532 Catalog as an open database for reproducibility and systematic evaluation. *Nat Genet*.  
533 2021;53: 420–425.
- 534 25. Mavaddat N, Michailidou K, Dennis J, Lush M, Fachal L, Lee A, et al. Polygenic Risk  
535 Scores for Prediction of Breast Cancer and Breast Cancer Subtypes. *Am J Hum Genet*.  
536 2019;104: 21–34.
- 537 26. Musliner KL, Mortensen PB, McGrath JJ, Suppli NP, Hougaard DM, Bybjerg-Grauholm  
538 J, et al. Association of Polygenic Liabilities for Major Depression, Bipolar Disorder, and  
539 Schizophrenia With Risk for Depression in the Danish Population. *JAMA Psychiatry*.  
540 2019;76: 516–525.
- 541 27. Cupido AJ, Tromp TR, Hovingh GK. The clinical applicability of polygenic risk scores for  
542 LDL-cholesterol: considerations, current evidence and future perspectives. *Curr Opin  
543 Lipidol*. 2021;32: 112–116.
- 544 28. Lambert SA, Abraham G, Inouye M. Towards clinical utility of polygenic risk scores.  
545 *Hum Mol Genet*. 2019;28: R133–R142.
- 546 29. Huang Q-M, Zhang P-D, Li Z-H, Zhou J-M, Liu D, Zhang X-R, et al. Genetic Risk and  
547 Chronic Obstructive Pulmonary Disease Independently Predict the Risk of Incident  
548 Severe COVID-19. *Ann Am Thorac Soc*. 2022;19: 58–65.
- 549 30. Dite GS, Murphy NM, Allman R. Development and validation of a clinical and genetic  
550 model for predicting risk of severe COVID-19. *Epidemiol Infect*. 2021;149: e162.
- 551 31. Dite GS, Murphy NM, Allman R. An integrated clinical and genetic model for predicting  
552 risk of severe COVID-19: A population-based case-control study. *PLoS One*. 2021;16:  
553 e0247205.
- 554 32. Horowitz JE, Kosmicki JA, Damask A, Sharma D, Roberts GHL, Justice AE, et al.  
555 Genome-wide analysis provides genetic evidence that ACE2 influences COVID-19 risk  
556 and yields risk scores associated with severe disease. *Nat Genet*. 2022;54: 382–392.
- 557 33. Ahmetov II, Borisov OV, Semenova EA, Andryushchenko ON, Andryushchenko LB,  
558 Generozov EV, et al. Team sport, power, and combat athletes are at high genetic risk  
559 for coronavirus disease-2019 severity. *J Sport Health Sci*. 2020;9: 430–431.
- 560 34. Farooqi R, Kooner JS, Zhang W. Associations between polygenic risk score and covid-  
561 19 susceptibility and severity across ethnic groups: UK Biobank analysis. *BMC Med  
562 Genomics*. 2023;16: 150.
- 563 35. Sudlow C, Gallacher J, Allen N, Beral V, Burton P, Danesh J, et al. UK biobank: an  
564 open access resource for identifying the causes of a wide range of complex diseases of  
565 middle and old age. *PLoS Med*. 2015;12: e1001779.
- 566 36. Chaubey A, Shenoy S, Mathur A, Ma Z, Valencia CA, Reddy Nallamilli BR, et al. Low-  
567 Pass Genome Sequencing: Validation and Diagnostic Utility from 409 Clinical Cases of  
568 Low-Pass Genome Sequencing for the Detection of Copy Number Variants to Replace  
569 Constitutional Microarray. *J Mol Diagn*. 2020;22: 823–840.



- 570 37. Li JH, Mazur CA, Berisa T, Pickrell JK. Low-pass sequencing increases the power of  
571 GWAS and decreases measurement error of polygenic risk scores compared to  
572 genotyping arrays. *Genome Res.* 2021;31: 529–537.
- 573 38. Rubinacci S, Ribeiro DM, Hofmeister RJ, Delaneau O. Efficient phasing and imputation  
574 of low-coverage sequencing data using large reference panels. *Nat Genet.* 2021;53:  
575 120–126.
- 576 39. Hui R, D’Atanasio E, Cassidy LM, Scheib CL, Kivisild T. Evaluating genotype imputation  
577 pipeline for ultra-low coverage ancient genomes. *Sci Rep.* 2020;10: 18542.
- 578 40. 1000 Genomes Project Consortium, Auton A, Brooks LD, Durbin RM, Garrison EP,  
579 Kang HM, et al. A global reference for human genetic variation. *Nature.* 2015;526: 68–  
580 74.
- 581 41. Bycroft C, Freeman C, Petkova D, Band G, Elliott LT, Sharp K, et al. The UK Biobank  
582 resource with deep phenotyping and genomic data. *Nature.* 2018;562: 203–209.
- 583 42. Jiang L, Zheng Z, Qi T, Kemper KE, Wray NR, Visscher PM, et al. A resource-efficient  
584 tool for mixed model association analysis of large-scale data. *Nat Genet.* 2019;51:  
585 1749–1755.
- 586 43. Hanley JA, McNeil BJ. The meaning and use of the area under a receiver operating  
587 characteristic (ROC) curve. *Radiology.* 1982;143: 29–36.
- 588 44. Frieser MJ, Wilson S, Vrieze S. Behavioral impact of return of genetic test results for  
589 complex disease: Systematic review and meta-analysis. *Health Psychol.* 2018;37:  
590 1134–1144.
- 591 45. Alex Buerkle C, Gompert Z. Population genomics based on low coverage sequencing:  
592 how low should we go? *Mol Ecol.* 2013;22: 3028–3035.
- 593 46. Homburger JR, Neben CL, Mishne G, Zhou AY, Kathiresan S, Khera AV. Low coverage  
594 whole genome sequencing enables accurate assessment of common variants and  
595 calculation of genome-wide polygenic scores. *Genome Med.* 2019;11: 74.
- 596 47. Andrews S. FastQC: A Quality Control Tool for High Throughput Sequence Data. In:  
597 FastQC [Internet]. 2010 [cited 2010]. Available:  
598 <http://www.bioinformatics.babraham.ac.uk/projects/fastqc/>
- 599 48. Li H, Durbin R. Fast and accurate short read alignment with Burrows–Wheeler  
600 transform. *Bioinformatics.* 2009;25: 1754–1760.
- 601 49. Li H, Handsaker B, Wysoker A, Fennell T, Ruan J, Homer N, et al. The Sequence  
602 Alignment/Map format and SAMtools. *Bioinformatics.* 2009;25: 2078–2079.
- 603 50. Manichaikul A, Mychaleckyj JC, Rich SS, Daly K, Sale M, Chen W-M. Robust  
604 relationship inference in genome-wide association studies. *Bioinformatics.* 2010;26:  
605 2867–2873.
- 606 51. HapMap Project. HapMap Project. In: HapMap 3 [Internet]. Available:  
607 <https://www.sanger.ac.uk/data/hapmap-3/>
- 608 52. Purcell S, Neale B, Todd-Brown K, Thomas L, Ferreira MAR, Bender D, et al. PLINK: a  
609 tool set for whole-genome association and population-based linkage analyses. *Am J*  
610 *Hum Genet.* 2007;81: 559–575.

- 611 53. Uffelmann E, Huang QQ, Munung NS, de Vries J, Okada Y, Martin AR, et al. Genome-  
612 wide association studies. *Nature Reviews Methods Primers*. 2021;1: 1–21.
- 613 54. Team RDC. R: A language and environment for statistical computing. (No Title). 2010  
614 [cited 20 Oct 2023]. Available: <https://cir.nii.ac.jp/crid/1370294721063650048>
- 615 55. Van Rossum G, Drake FL. *Python 3 Reference Manual*; CreateSpace: Scotts Valley,  
616 CA, USA, 2009. Google Scholar.
- 617 56. Goel MK, Khanna P, Kishore J. Understanding survival analysis: Kaplan-Meier estimate.  
618 *Int J Ayurveda Res*. 2010;1: 274–278.
- 619
