# Supplementary material for: Analysis of associations between polygenic risk score and COVID-19 severity in a Russian population using low-pass genome sequencing
Source: bioRxiv or medRxiv preprint supplement (doi:10.1101/2023.11.20.23298335), 2023-12-08
Supplement: Supplementary file [file media-1.pdf]

## Supplementary Materials

These supplementary materials present additional details about the results.

### LOGISTIC REGRESSION RESULTS

#### The full model

We analysed the association between PRS and severe COVID-19 using a multivariate logistic regression model adjusted for sex, age, and the first 10 principal components of genetic variation.

**Table 1:** Logistic regression results for the full model.

|                  | <b>coef</b> | <b>std err</b> | <b>z</b> | <b>P&gt; z </b> | <b>[0.025</b> | <b>0.975]</b> |
|------------------|-------------|----------------|----------|-----------------|---------------|---------------|
| <b>intercept</b> | -0.0495     | 0.219          | -0.226   | 0.821           | -0.478        | 0.379         |
| <b>age</b>       | 0.5637      | 0.078          | 7.187    | 0.000           | 0.410         | 0.717         |
| <b>sex</b>       | -0.5737     | 0.145          | -3.952   | 0.000           | -0.858        | -0.289        |
| <b>PRS</b>       | 0.4135      | 0.073          | 5.651    | 0.000           | 0.270         | 0.557         |
| <b>PC1</b>       | -0.0025     | 0.095          | -0.026   | 0.979           | -0.189        | 0.184         |
| <b>PC2</b>       | 0.2154      | 1.240          | 0.174    | 0.862           | -2.216        | 2.647         |
| <b>PC3</b>       | -0.5792     | 1.203          | -0.481   | 0.630           | -2.938        | 1.779         |
| <b>PC4</b>       | 0.3239      | 0.599          | 0.541    | 0.589           | -0.850        | 1.498         |
| <b>PC5</b>       | 0.3810      | 0.409          | 0.931    | 0.352           | -0.421        | 1.183         |
| <b>PC6</b>       | 0.2982      | 0.296          | 1.009    | 0.313           | -0.281        | 0.878         |
| <b>PC7</b>       | -0.1118     | 0.109          | -1.022   | 0.307           | -0.326        | 0.103         |
| <b>PC8</b>       | -0.0367     | 0.072          | -0.510   | 0.610           | -0.178        | 0.104         |
| <b>PC9</b>       | 0.0875      | 0.085          | 1.031    | 0.303           | -0.079        | 0.254         |
| <b>PC10</b>      | 0.0153      | 0.072          | 0.212    | 0.832           | -0.127        | 0.157         |

- **coef:** the coefficient of the variable (log[odds ratio]);
- **std err:** the standard error of the coefficient;
- **Z:** the z value for the estimated coefficient and the standard error;
- **P>|z|:** the p-value associated with the value in the z value column;
- **[0.025, 0.975]:** 95% confident interval (CI) for the coefficient.

#### The covariates-only model

The base model contains only the demographic predictors (sex, age, and the first 10 principal components of genetic variation).

**Table 2:** Logistic regression results for the covariates-only model.

|  | <b>coef</b> | <b>std err</b> | <b>z</b> | <b>P&gt; z </b> | <b>[0.025</b> | <b>0.975]</b> |
|--|-------------|----------------|----------|-----------------|---------------|---------------|
|--|-------------|----------------|----------|-----------------|---------------|---------------|

|                  |         |       |        |       |        |        |
|------------------|---------|-------|--------|-------|--------|--------|
| <b>intercept</b> | -0.0549 | 0.214 | -0.257 | 0.797 | -0.474 | 0.364  |
| <b>age</b>       | 0.5321  | 0.076 | 6.982  | 0.000 | 0.383  | 0.681  |
| <b>sex</b>       | -0.5383 | 0.143 | -3.775 | 0.000 | -0.818 | -0.259 |
| <b>PC1</b>       | -0.0284 | 0.093 | -0.305 | 0.760 | -0.211 | 0.154  |
| <b>PC2</b>       | 0.8426  | 1.226 | 0.687  | 0.492 | -1.561 | 3.246  |
| <b>PC3</b>       | -1.0866 | 1.186 | -0.916 | 0.360 | -3.412 | 1.238  |
| <b>PC4</b>       | 0.2649  | 0.513 | 0.516  | 0.606 | -0.741 | 1.271  |
| <b>PC5</b>       | 0.3364  | 0.354 | 0.950  | 0.342 | -0.357 | 1.030  |
| <b>PC6</b>       | 0.2184  | 0.250 | 0.874  | 0.382 | -0.271 | 0.708  |
| <b>PC7</b>       | -0.0971 | 0.117 | -0.832 | 0.405 | -0.326 | 0.132  |
| <b>PC8</b>       | -0.0362 | 0.071 | -0.508 | 0.612 | -0.176 | 0.104  |
| <b>PC9</b>       | 0.1146  | 0.083 | 1.377  | 0.169 | -0.049 | 0.278  |
| <b>PC10</b>      | 0.0180  | 0.071 | 0.255  | 0.799 | -0.121 | 0.157  |

### The PRS-only model

The base model contains only PRS predictor.

**Table 3:** Logistic regression results for the PRS-only model.

|                  | <b>coef</b> | <b>std err</b> | <b>z</b> | <b>P&gt; z </b> | <b>[0.025</b> | <b>0.975]</b> |
|------------------|-------------|----------------|----------|-----------------|---------------|---------------|
| <b>intercept</b> | -0.8025     | 0.081          | -9.923   | 0.000           | -0.961        | -0.644        |
| <b>PRS</b>       | 0.3727      | 0.071          | 5.278    | 0.000           | 0.234         | 0.511         |
| <b>PC1</b>       | -0.0165     | 0.092          | -0.178   | 0.858           | -0.197        | 0.164         |
| <b>PC2</b>       | 0.4333      | 1.177          | 0.368    | 0.713           | -1.874        | 2.740         |
| <b>PC3</b>       | -0.8196     | 1.152          | -0.711   | 0.477           | -3.078        | 1.439         |
| <b>PC4</b>       | 0.2147      | 0.525          | 0.409    | 0.683           | -0.815        | 1.244         |
| <b>PC5</b>       | 0.3026      | 0.358          | 0.845    | 0.398           | -0.399        | 1.005         |
| <b>PC6</b>       | 0.2557      | 0.263          | 0.972    | 0.331           | -0.260        | 0.771         |
| <b>PC7</b>       | -0.1390     | 0.111          | -1.254   | 0.210           | -0.356        | 0.078         |
| <b>PC8</b>       | -0.0669     | 0.077          | -0.869   | 0.385           | -0.218        | 0.084         |
| <b>PC9</b>       | 0.0808      | 0.083          | 0.977    | 0.328           | -0.081        | 0.243         |
| <b>PC10</b>      | -0.0271     | 0.070          | -0.387   | 0.699           | -0.164        | 0.110         |

### The full model with PRS as a binary predictor

We analysed the association between PRS and severe COVID-19 using a multivariate logistic regression model adjusted for sex, age, and the first 10 principal components of genetic variation. PRS values were considered as a binary predictor, where the highest 10% of PRS were taken as 1, others as 0.

**Table 4:** Logistic regression results for the full model with PRS as a binary predictor.

|                                        | <b>coef</b> | <b>std err</b> | <b>z</b> | <b>P&gt; z </b> | <b>[0.025</b> | <b>0.975]</b> |
|----------------------------------------|-------------|----------------|----------|-----------------|---------------|---------------|
| <b>intercept</b>                       | -0.0781     | 0.223          | -0.350   | 0.726           | -0.515        | 0.359         |
| <b>10% with the highest PRS values</b> | 0.9143      | 0.225          | 4.069    | 0.000           | 0.474         | 1.355         |
| <b>10% with the lowest PRS values</b>  | -1.0727     | 0.290          | -3.703   | 0.000           | -1.640        | -0.505        |
| <b>age</b>                             | 0.5789      | 0.079          | 7.342    | 0.000           | 0.424         | 0.733         |
| <b>sex</b>                             | -0.5430     | 0.145          | -3.746   | 0.000           | -0.827        | -0.259        |
| <b>PC1</b>                             | -0.0078     | 0.095          | -0.082   | 0.935           | -0.195        | 0.179         |
| <b>PC2</b>                             | 0.5737      | 1.249          | 0.459    | 0.646           | -1.875        | 3.023         |
| <b>PC3</b>                             | -0.8886     | 1.208          | -0.736   | 0.462           | -3.256        | 1.479         |
| <b>PC4</b>                             | 0.3058      | 0.612          | 0.500    | 0.617           | -0.893        | 1.505         |
| <b>PC5</b>                             | 0.3584      | 0.417          | 0.859    | 0.390           | -0.459        | 1.176         |
| <b>PC6</b>                             | 0.3072      | 0.300          | 1.023    | 0.306           | -0.281        | 0.896         |
| <b>PC7</b>                             | -0.0974     | 0.112          | -0.871   | 0.384           | -0.317        | 0.122         |
| <b>PC8</b>                             | -0.0315     | 0.072          | -0.436   | 0.663           | -0.173        | 0.110         |
| <b>PC9</b>                             | 0.0818      | 0.085          | 0.959    | 0.338           | -0.085        | 0.249         |
| <b>PC10</b>                            | 0.0190      | 0.073          | 0.261    | 0.794           | -0.123        | 0.161         |
